# Supplementary material for: Intrinsic Proteolytic Activities from Cancer Cells Are Sufficient to Activate Alkoxyamine Prodrugs and Induce Cell Death
Source: PubMed Central journal article supplement — ACS Omega. 2024 Sep 5;9(37):39004–12. doi: 10.1021/acsomega.4c05592 (PMC11411533; doi:10.1021/acsomega.4c05592), 2024-09-05
Supplement: ao4c05592_si_001.pdf [file ao4c05592_si_001.pdf]

# Intrinsic proteolytic activities from cancer cells are sufficient to activate alkoxyamine prodrugs and induce cell death

Marion Filiâtre<sup>1,†</sup>, Seda Seren<sup>2, †</sup>, Ange W. Embo-Ibouanga<sup>1</sup> Ange, Jean-Patrick Joly<sup>1</sup> ; Véronique Bouchaud<sup>2</sup>, Ines Kelkoul<sup>2</sup>, Sylvain R. A. Marque<sup>1</sup>, Gérard Audran<sup>1</sup>, Pierre Voisin<sup>2</sup>, Philippe Mellet<sup>2,3,\*</sup>

<sup>1</sup> Aix-Marseille University, CNRS, UMR 7273, 13007 Marseille, France.

<sup>2</sup> Magnetic Resonance of Biological Systems, UMR 5536 CNRS-University of Bordeaux, 33076 Bordeaux, France.

<sup>3</sup> INSERM, 33076 Bordeaux, France.

† These authors contributed equally

\*Correspondence: [philippe.mellet@rmsb.u-bordeaux.fr](mailto:philippe.mellet@rmsb.u-bordeaux.fr)

**Characterization of alkoxyamines alkoxyamines 1.c-a and 2.c-a:**

|                                                                                               |           |
|-----------------------------------------------------------------------------------------------|-----------|
| <b>1-c</b> <sup>1</sup> H, <sup>13</sup> C, DEPT 135 AND HRMS .....                           | 3         |
| <b>2-c</b> <sup>1</sup> H, <sup>13</sup> C, DEPT 135 AND HRMS .....                           | 5         |
| <b>1-b</b> <sup>1</sup> H, <sup>13</sup> C, DEPT 135 AND HRMS .....                           | 7         |
| <b>2-b</b> <sup>1</sup> H, <sup>13</sup> C, DEPT 135 AND HRMS .....                           | 9         |
| <b>1-a</b> <sup>1</sup> H, <sup>13</sup> C, DEPT 135 AND HRMS .....                           | 11        |
| <b>2-a</b> <sup>1</sup> H, <sup>13</sup> C, DEPT 135 AND HRMS .....                           | 13        |
| <b>HPLC TRACES OF PGLU-GLY-LYS-ANILIDE-TEMPO 1.A AND PGLU-GLY-ARG-ANILIDE-TEMPO 2.A .....</b> | <b>15</b> |
| <b>Kinetic Analysis of Alkoxyamine Bond Homolysis.....</b>                                    | <b>15</b> |
| <b>Proof for the inactivity of MMP-2 on suc-AAPV-Anilide-TEMPO.....</b>                       | <b>16</b> |

Figure S1: 1-c (<sup>1</sup>H NMR)

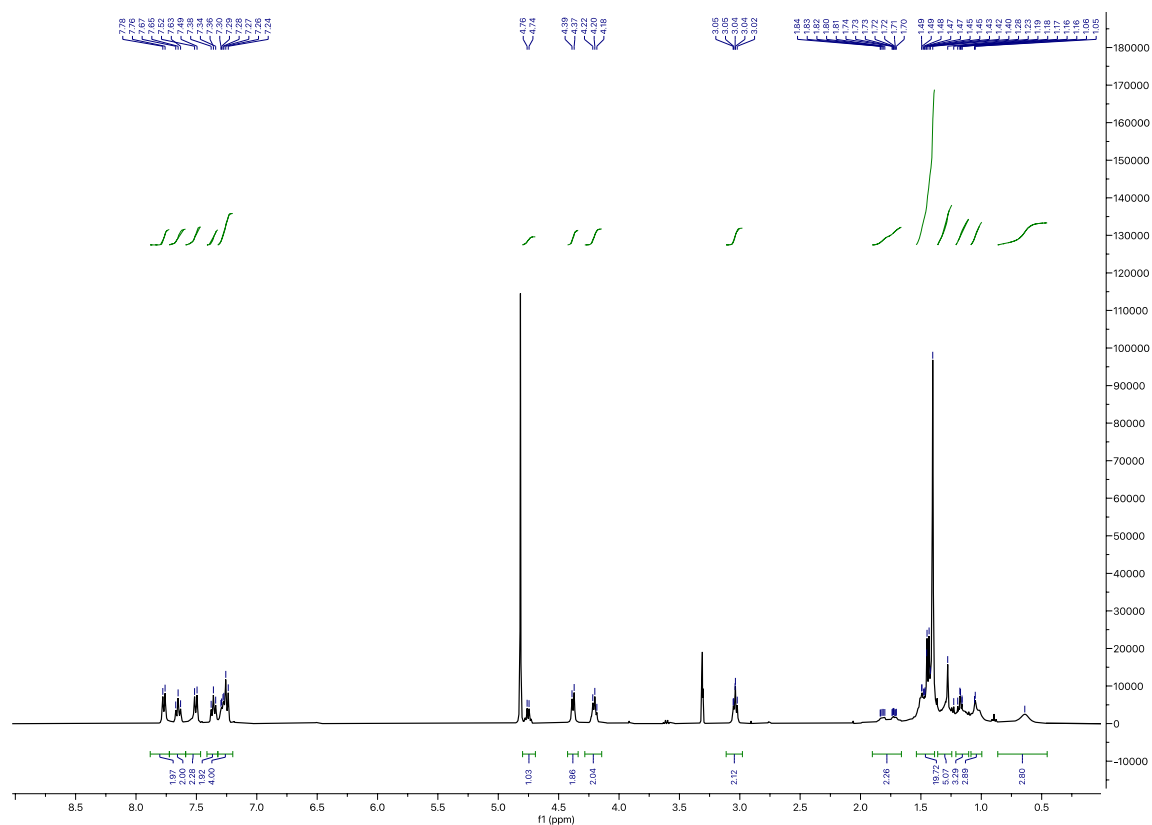

Figure S2: 1-c (<sup>13</sup>C NMR)

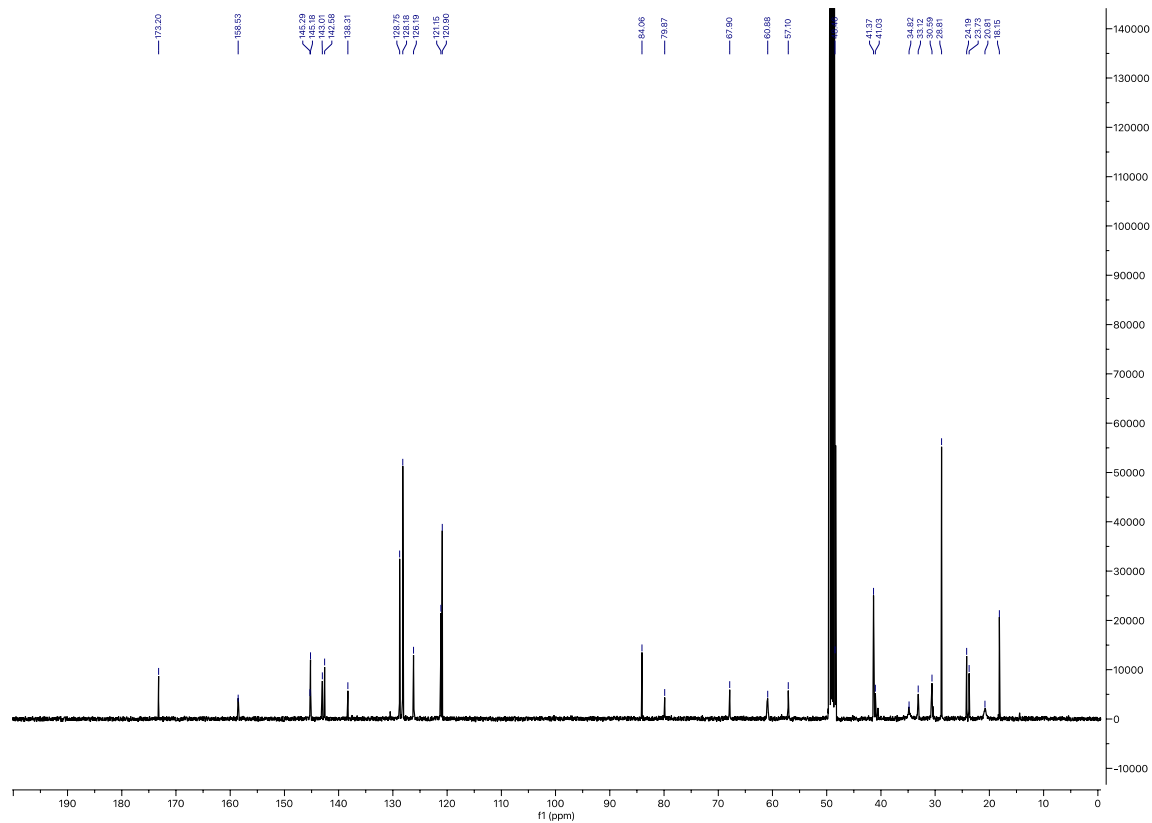

Figure S3: 1-c (<sup>13</sup>C DEPT NMR)

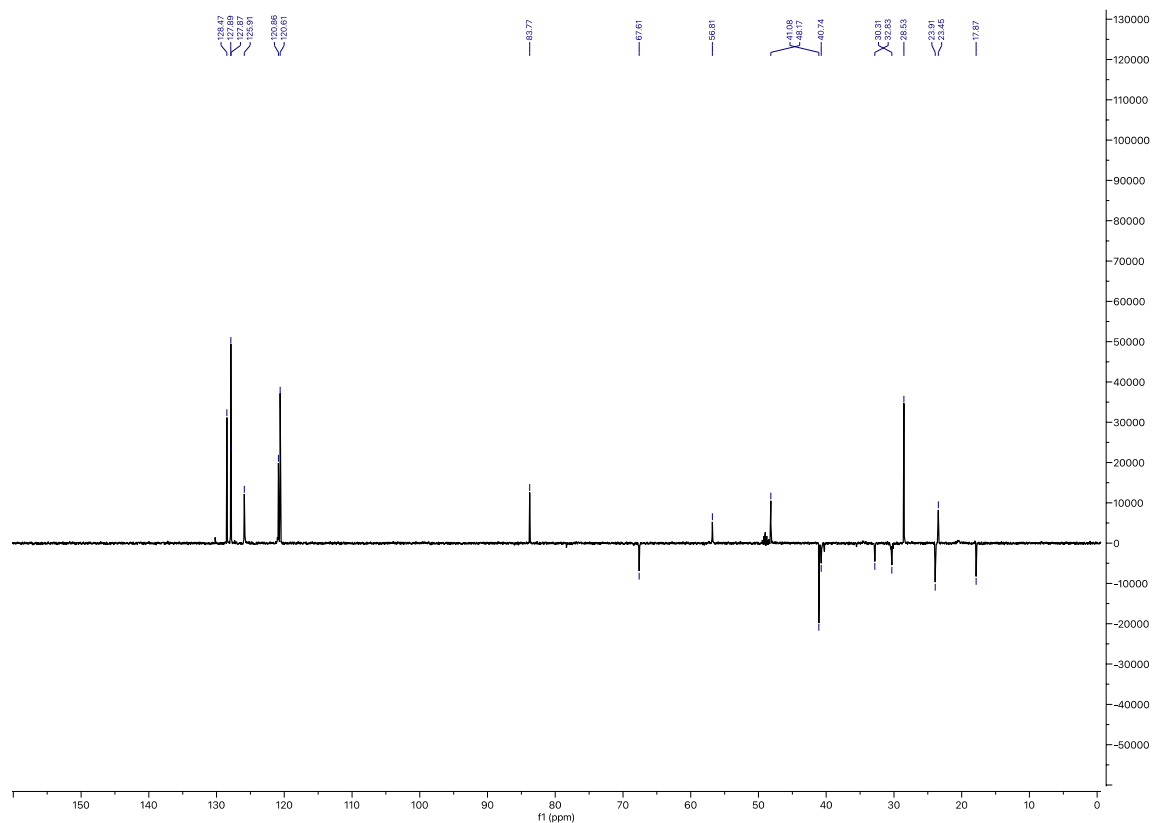

Figure S4: 1-c HRMS

JP2353\_Mex3 12 (0.299)

1: TOF MS ES+  
2.47e6

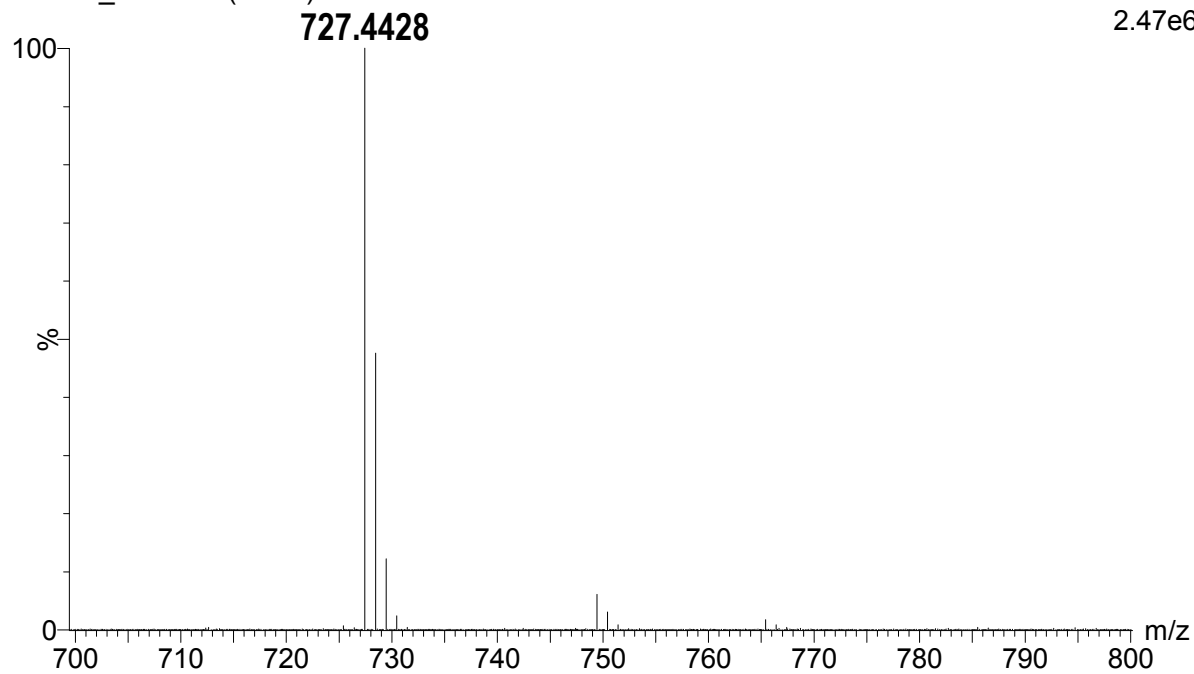

Figure S5: 1-c (<sup>1</sup>H NMR)

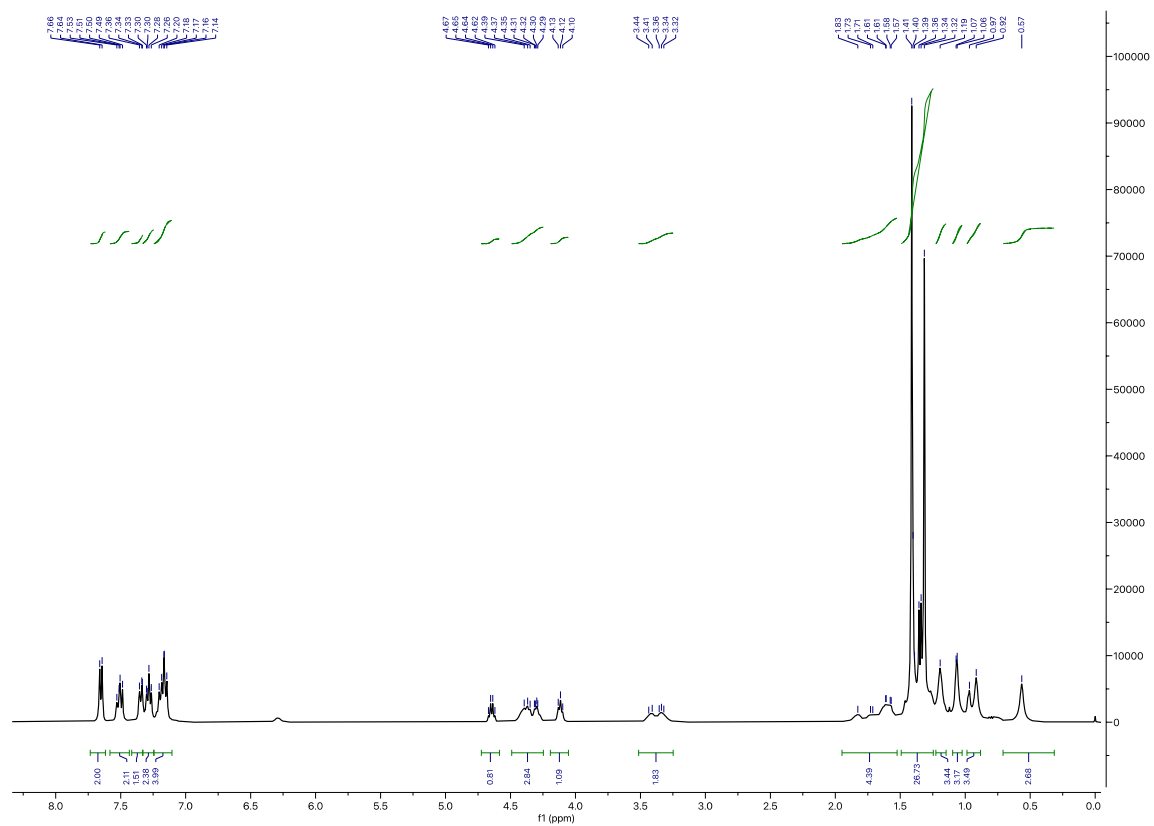

Figure S6: 2-c (<sup>13</sup>C NMR)

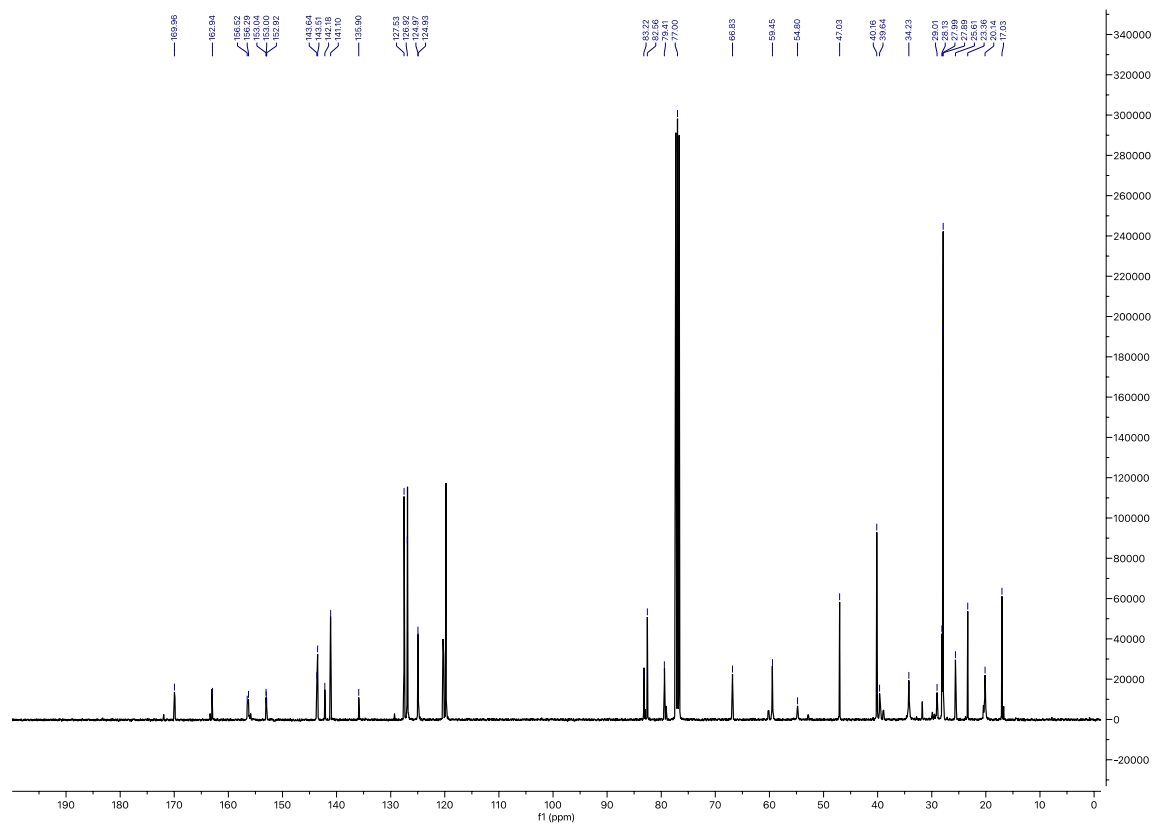

Figure S7: 2-c ( $^{13}\text{C}$  DEPT 135 NMR)

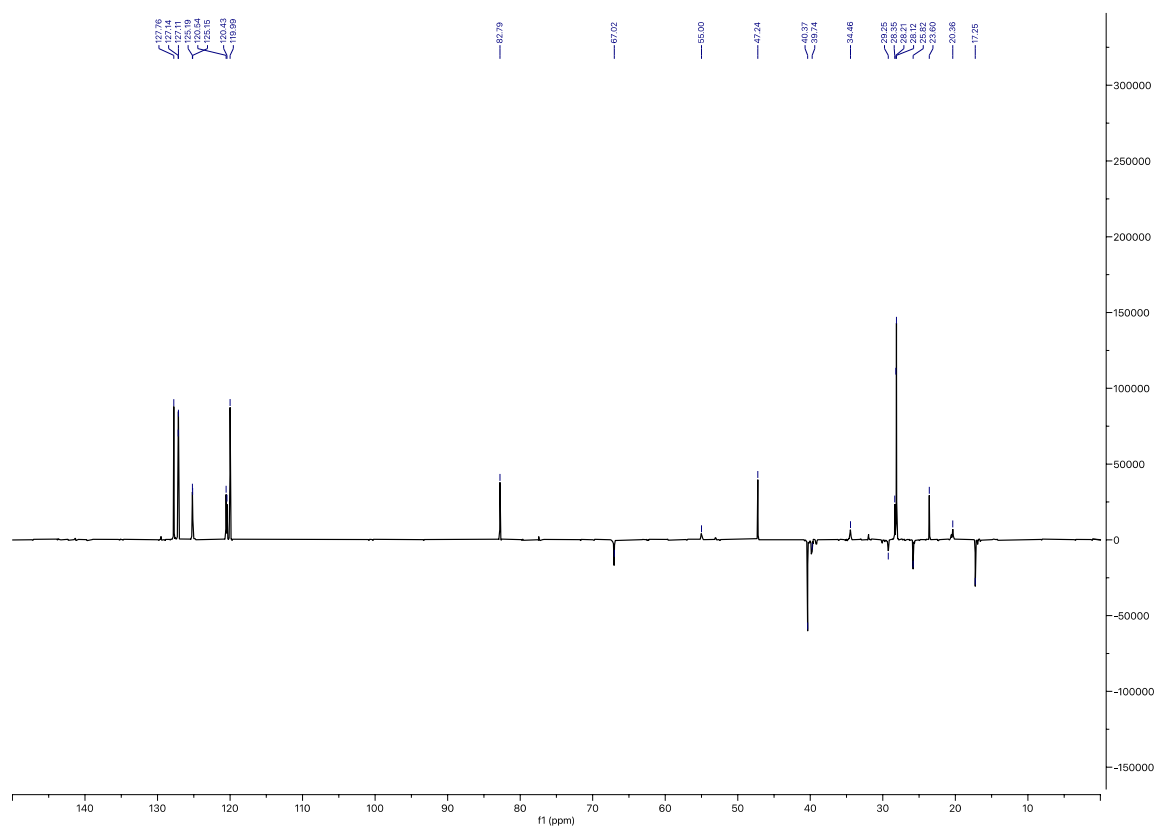

Figure S8: 2-c (HRMS)

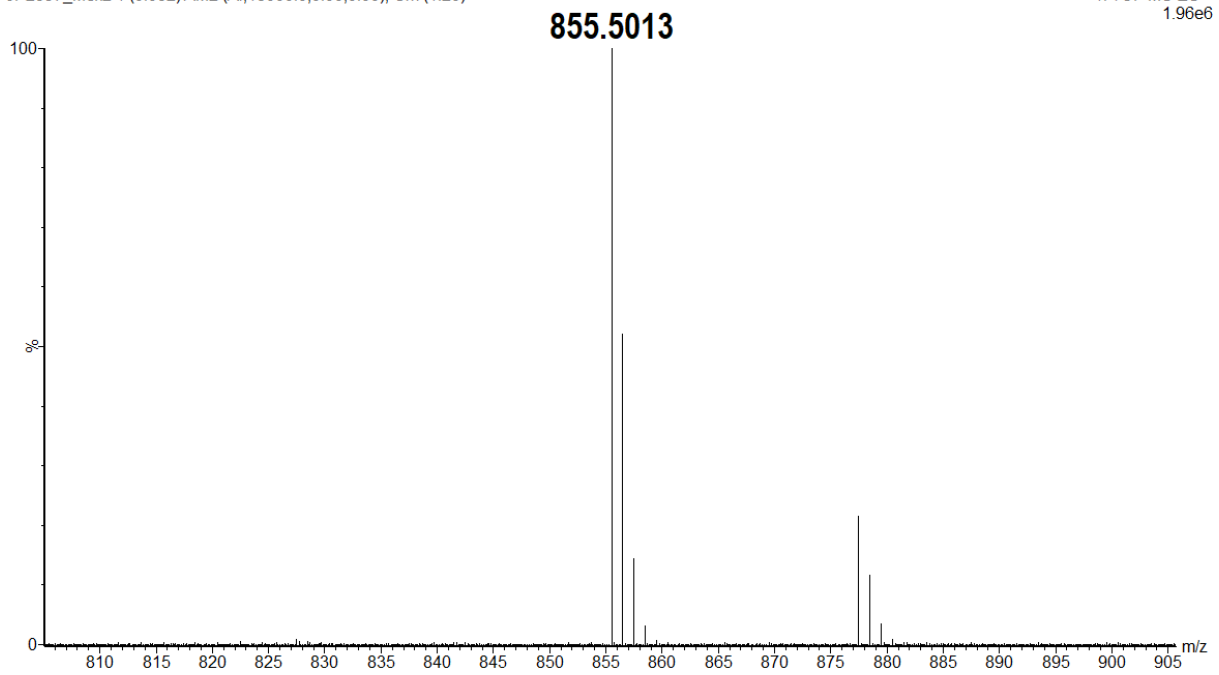

Figure S9: 1-b (<sup>1</sup>H NMR)

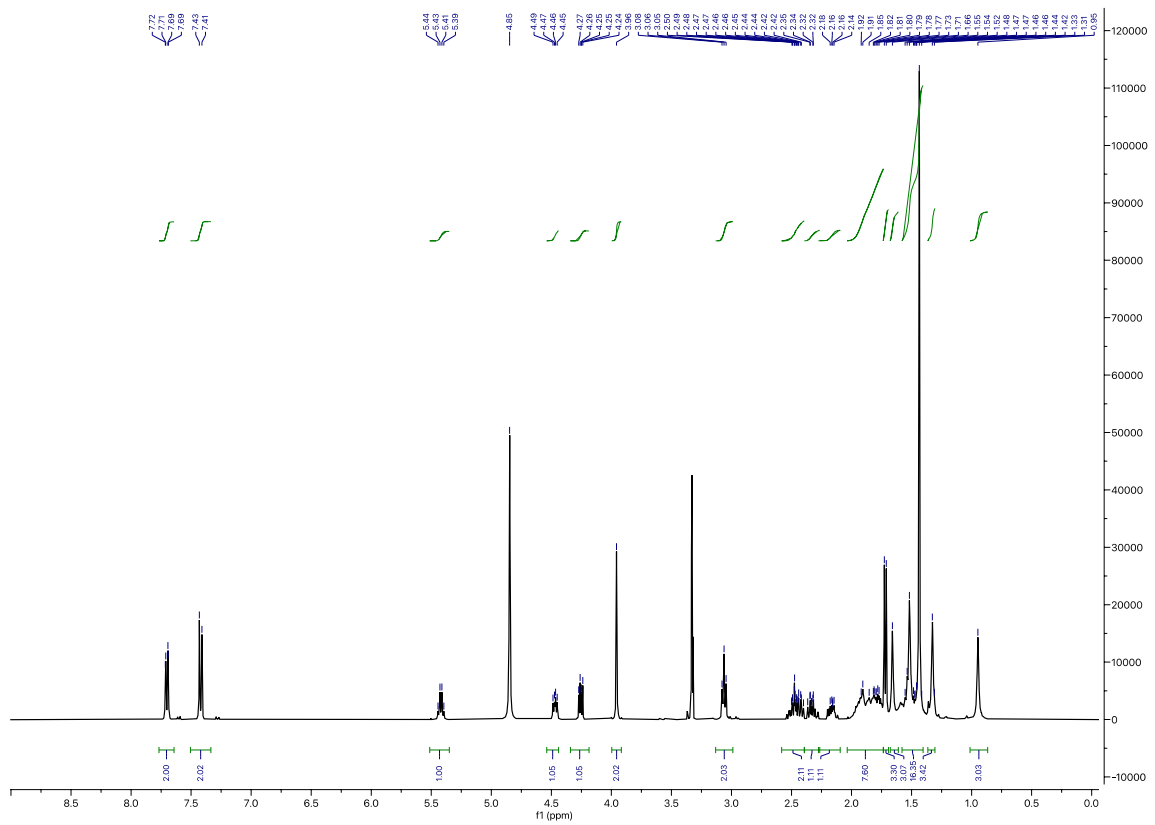

Figure S10: 1-b (<sup>13</sup>C NMR)

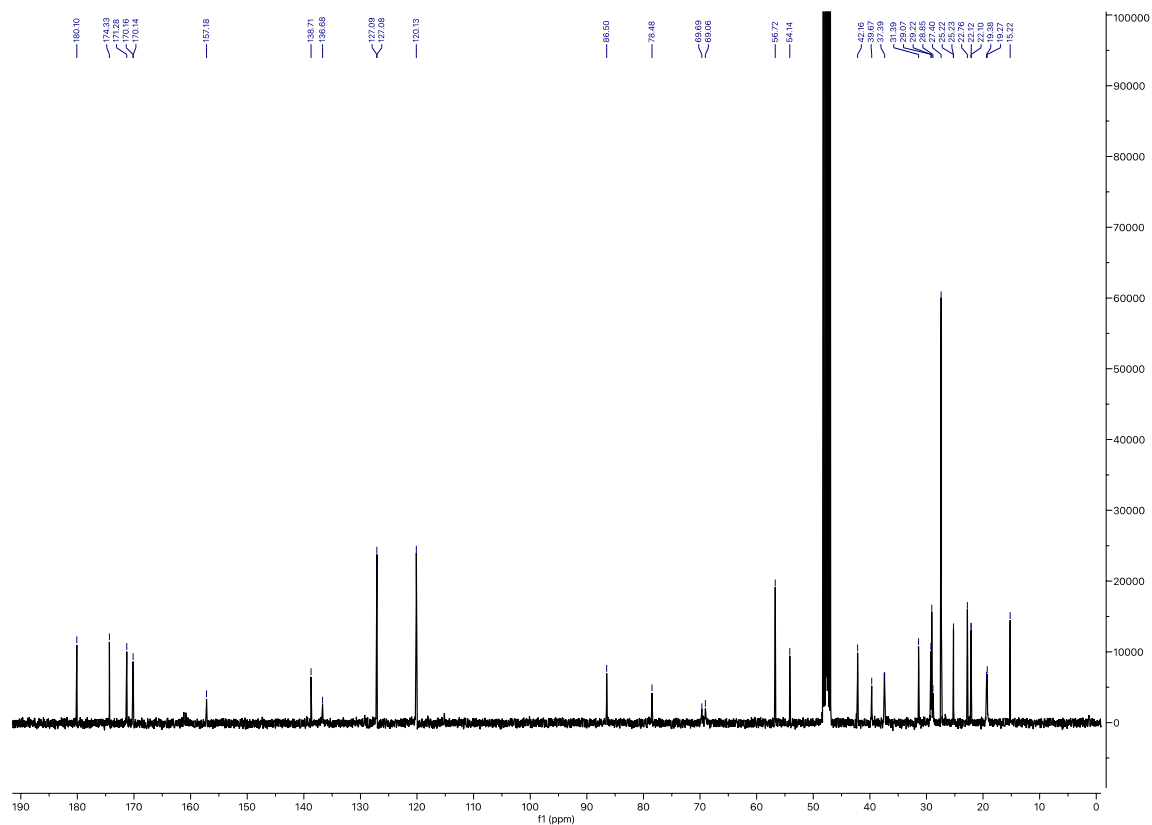

Figure S11: 1-b (<sup>13</sup>C DEPT 135 NMR)

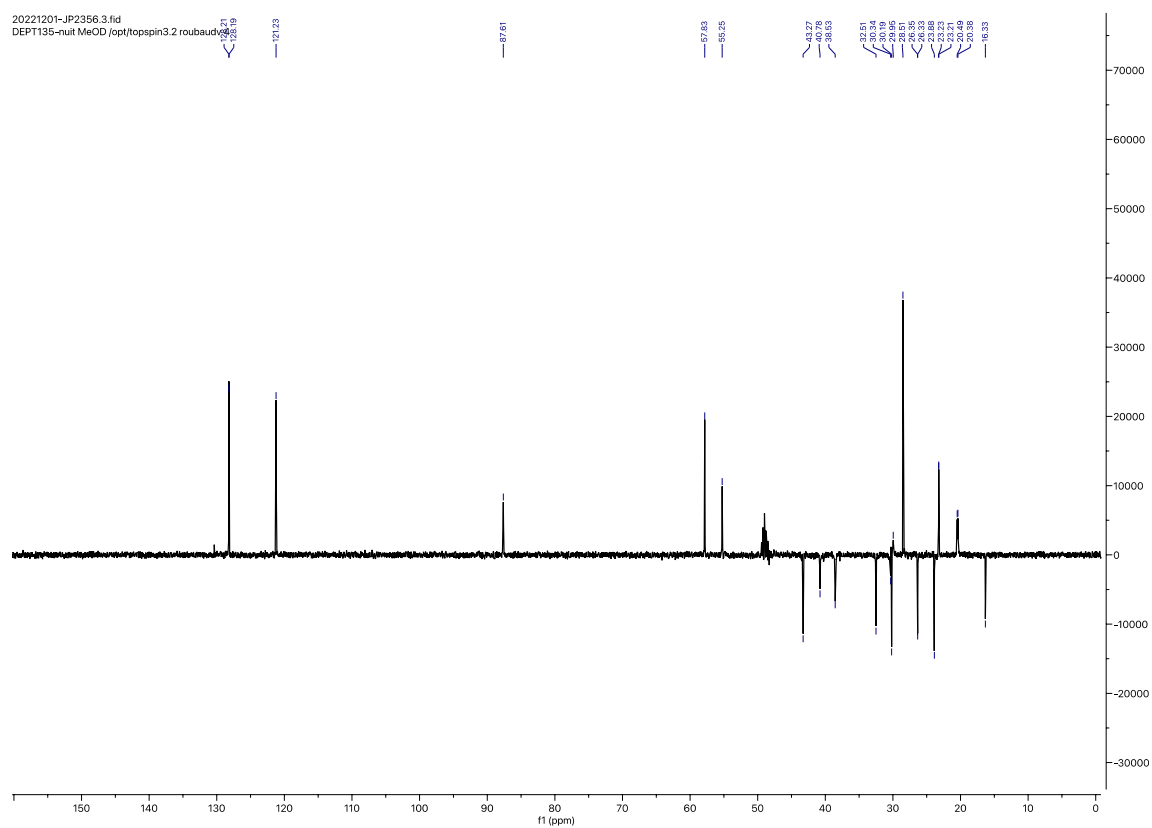

Figure S12: 1-b (HRMS)



JP2356\_Mex2 9 (0.228)

1: TOF MS ES+  
2.48e6

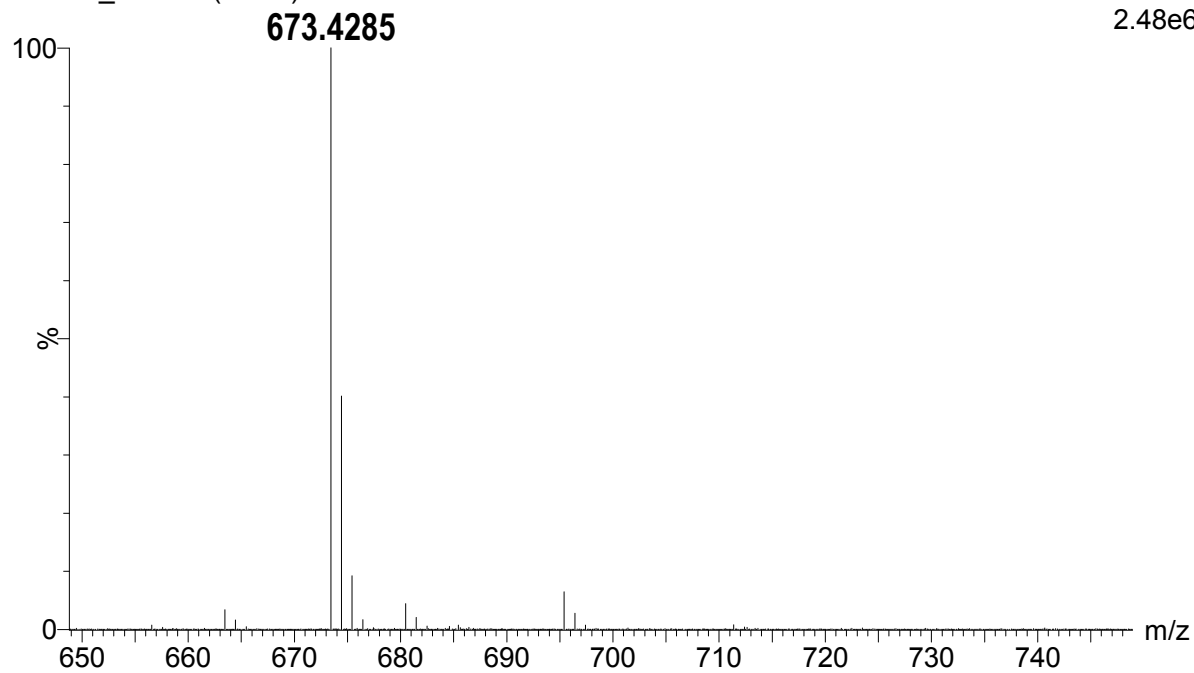

Figure S13: 2-b (<sup>1</sup>H NMR)

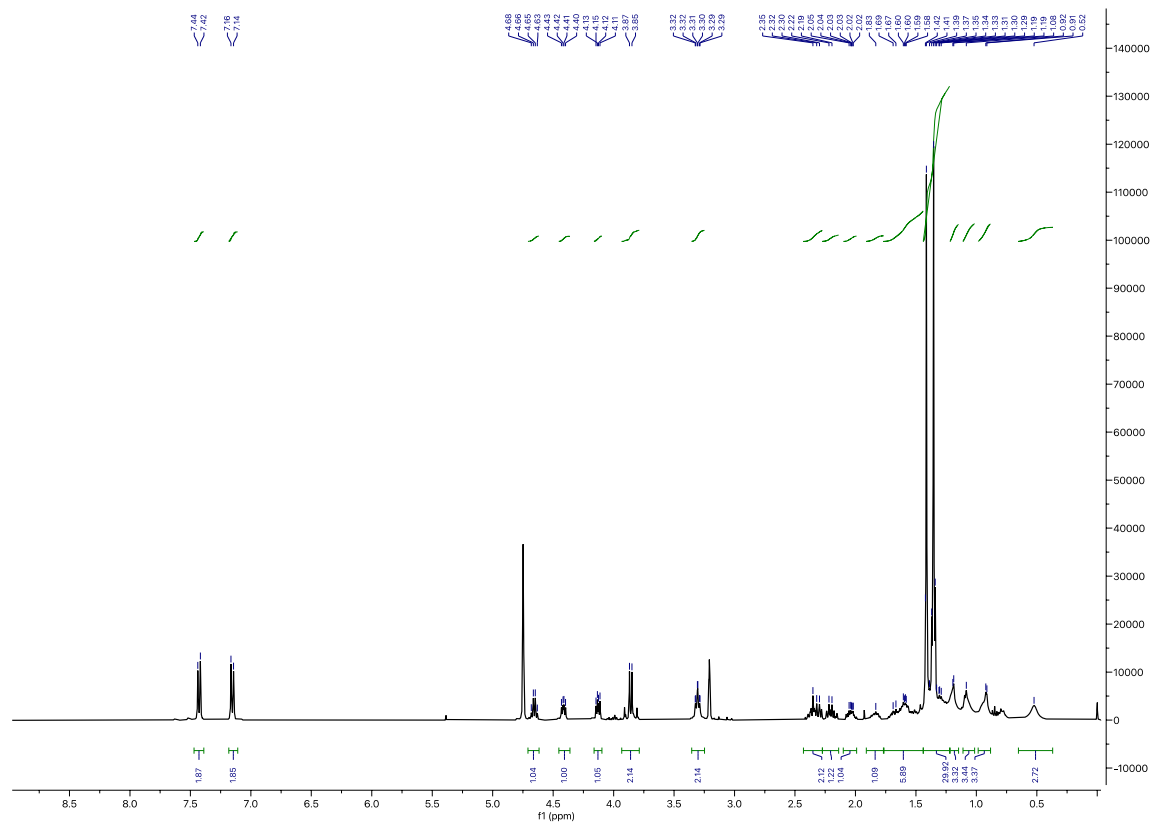

Figure S14: 2-b (<sup>13</sup>C NMR)

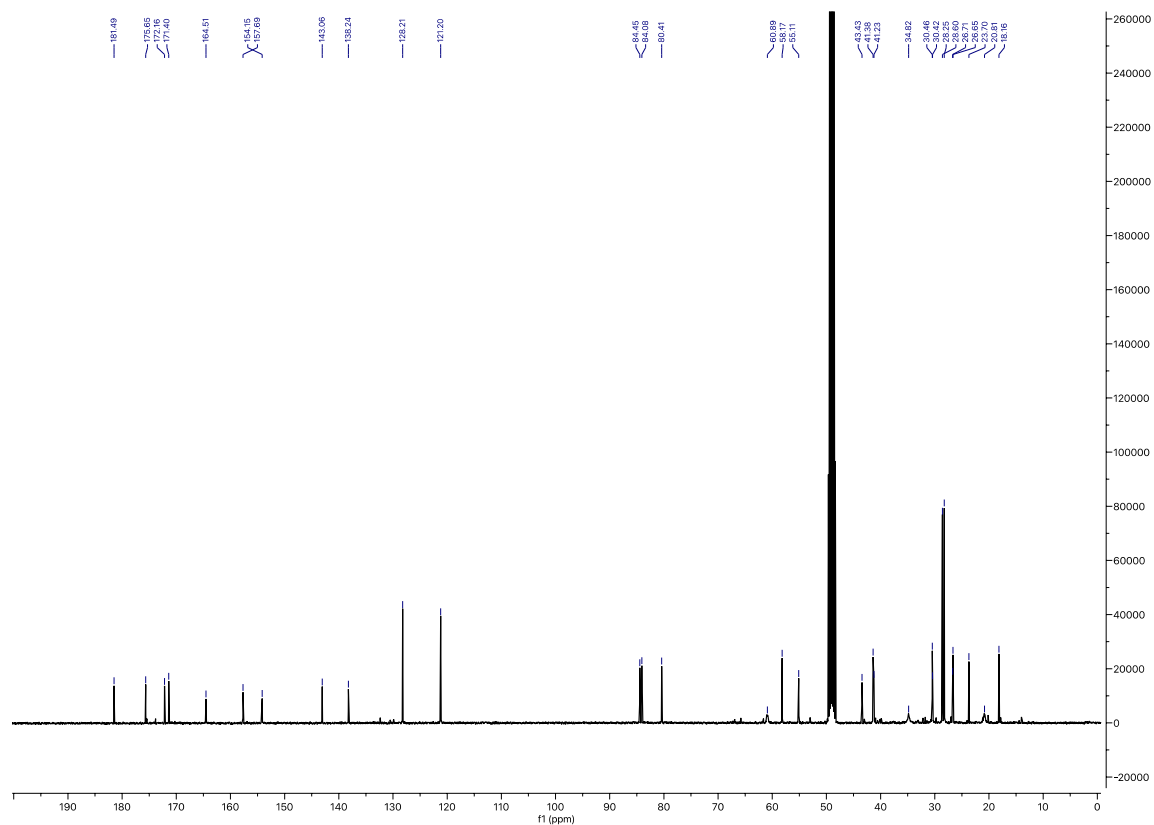

Figure S15: 2-b (<sup>13</sup>C DEPT 135 NMR)

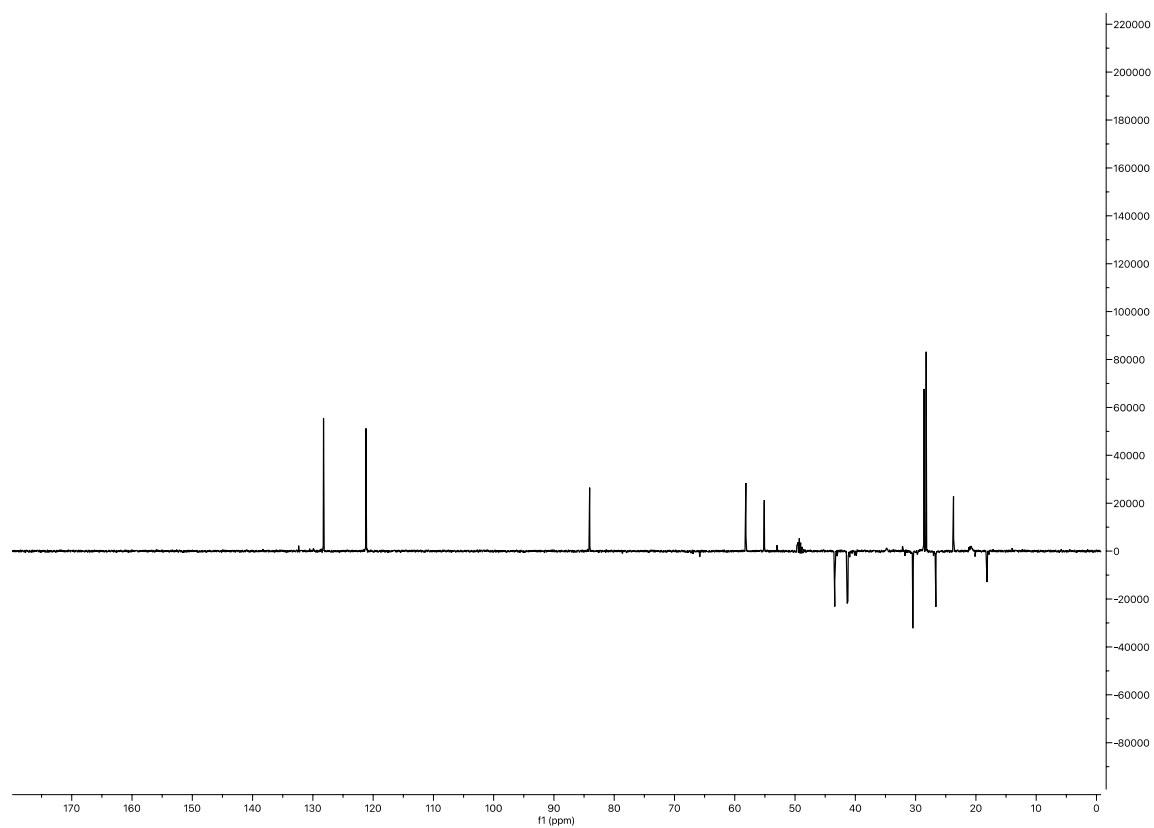

Figure S16: 2-b (HRMS)

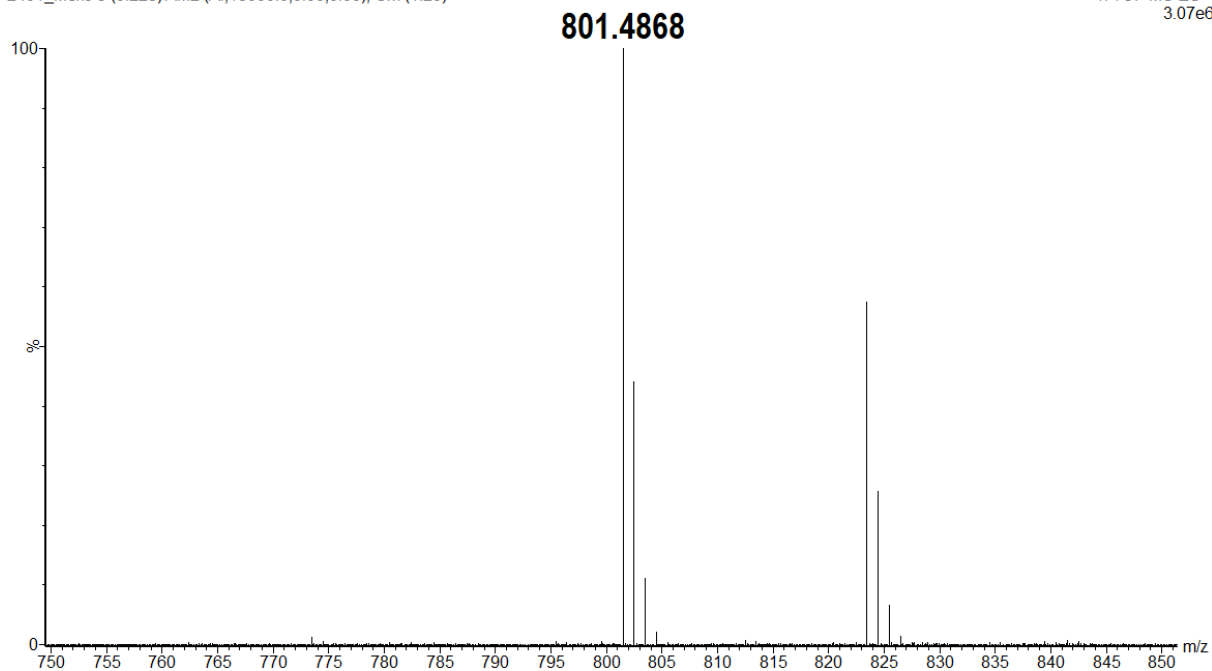

Figure S17: 1-a (<sup>1</sup>H NMR)

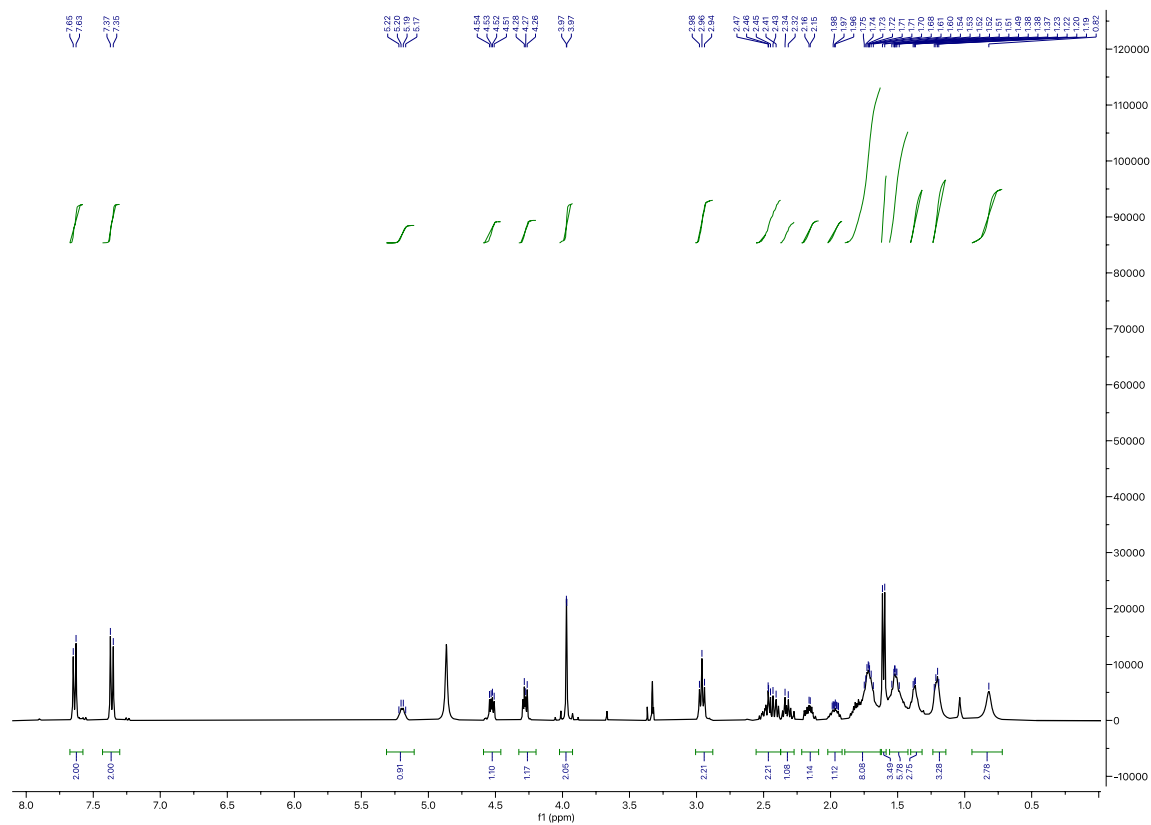

Figure S18: 1-a (<sup>13</sup>C NMR)

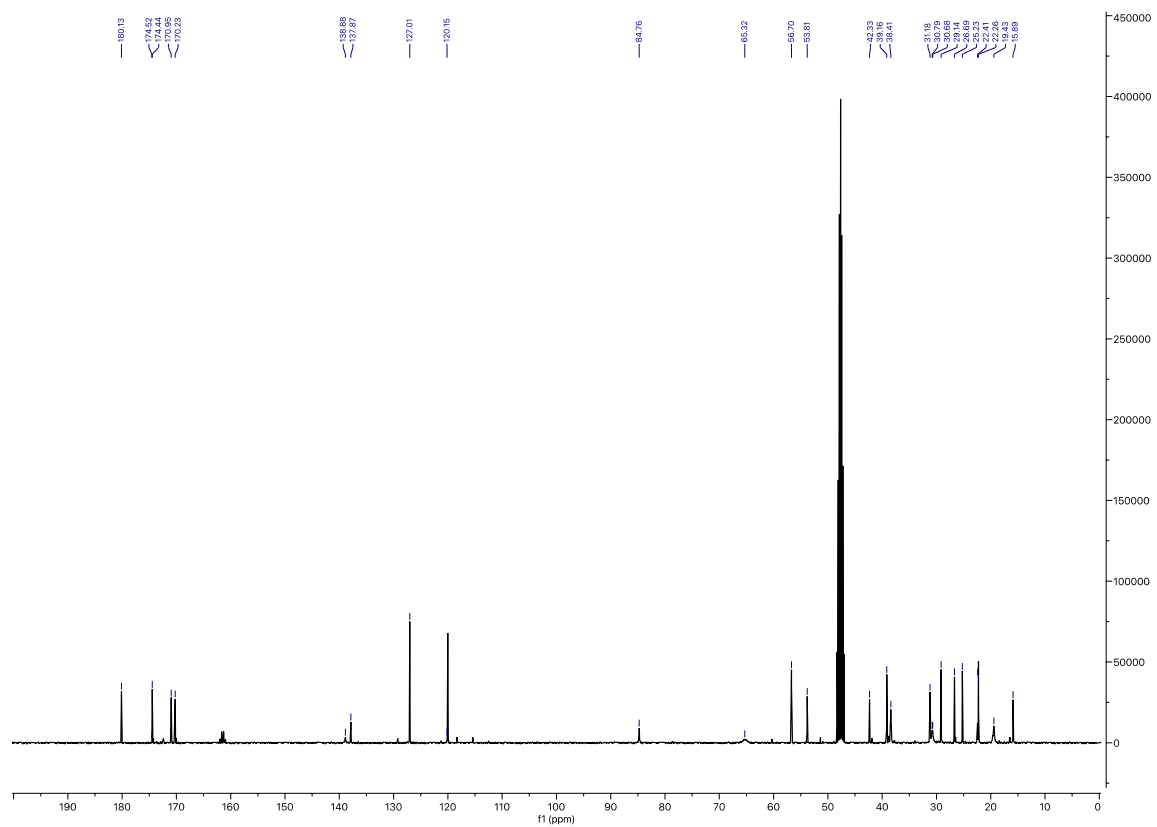

Figure S19: 1-a ( $^{13}\text{C}$  DEPT 135 NMR)

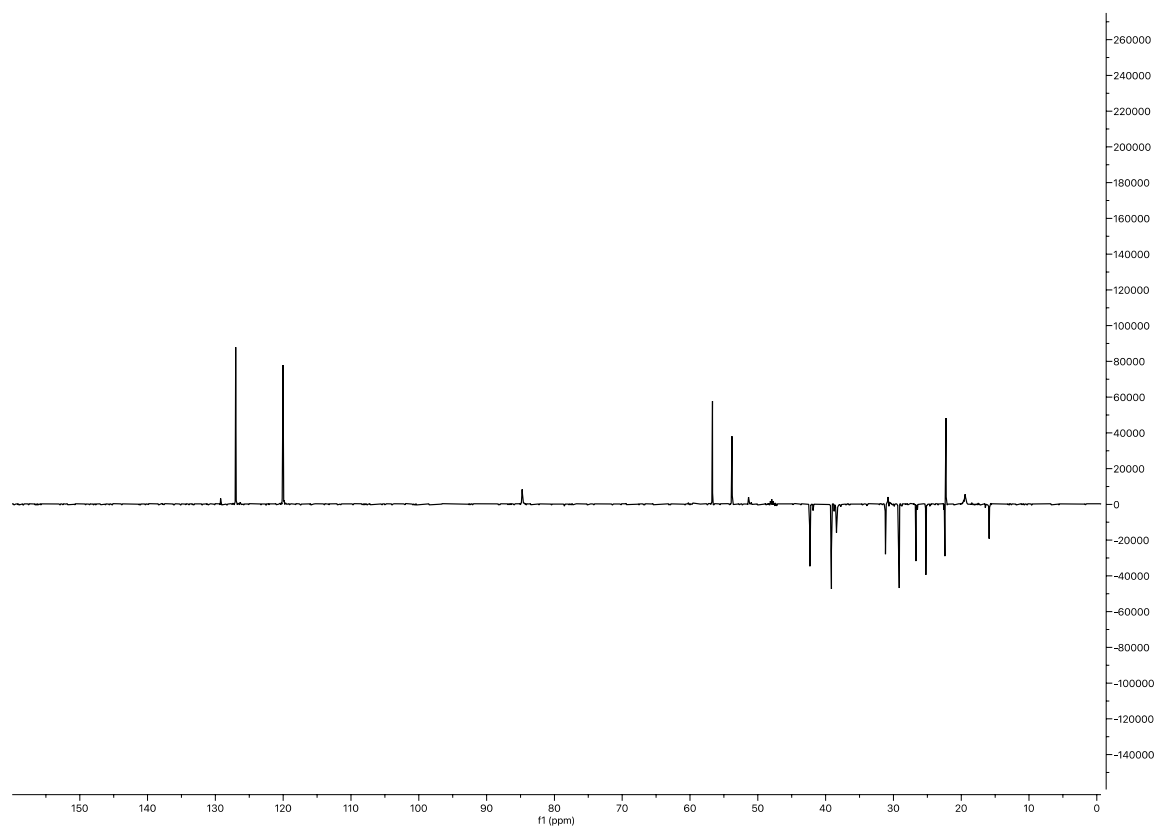

Figure S20: 1-a (HRMS)

JP2358\_Mex3 12 (0.299)

1: TOF MS ES+  
1.18e7

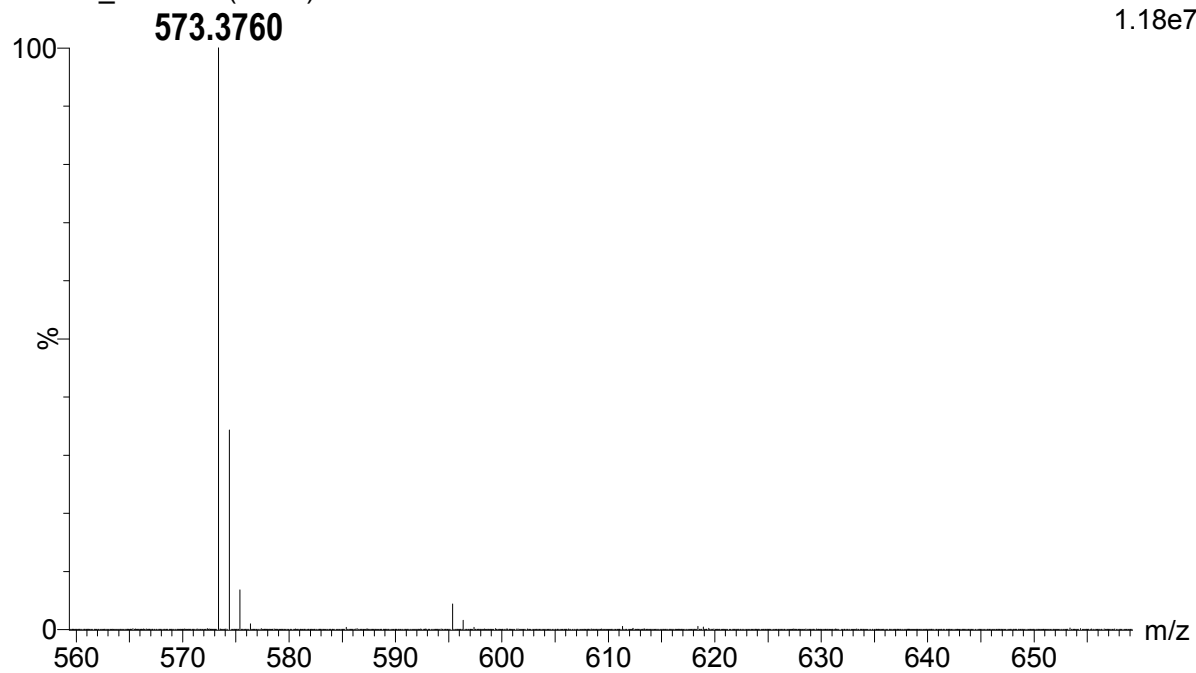

Figure S21: 2-a (<sup>1</sup>H NMR)

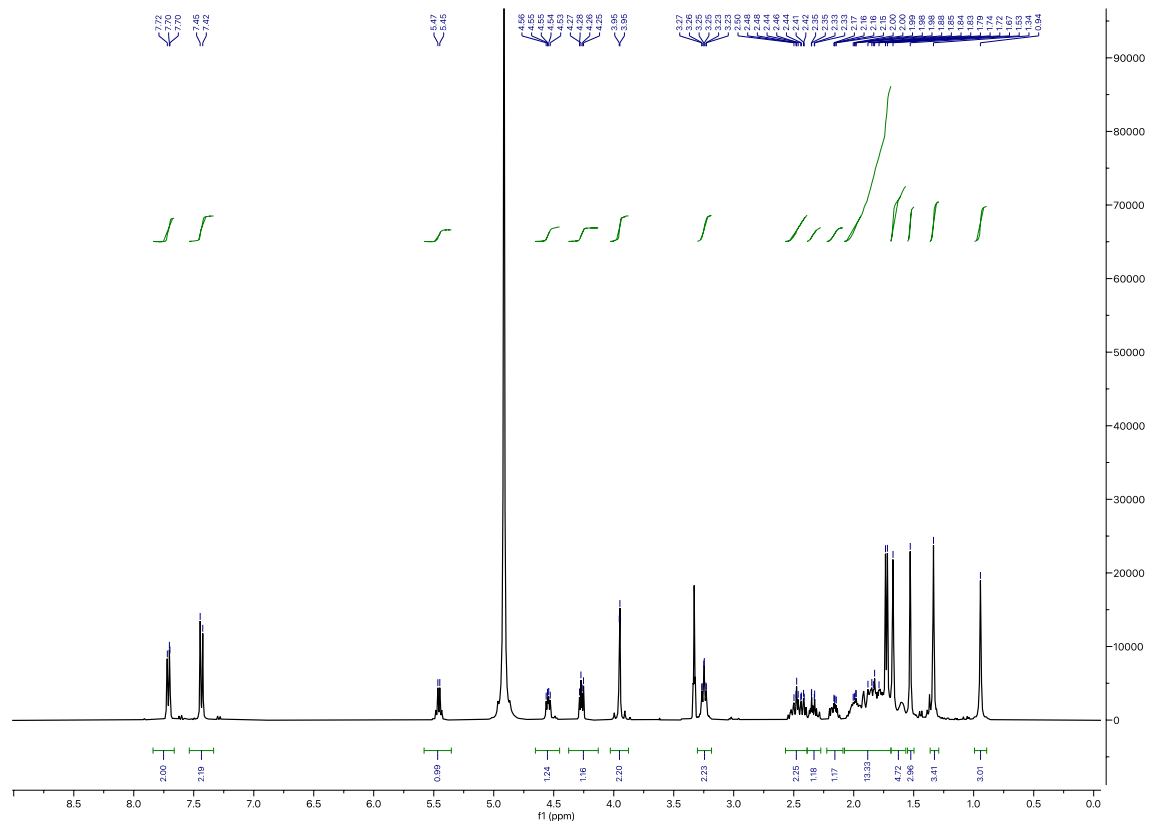

Figure S22: 2-a (<sup>13</sup>C NMR)

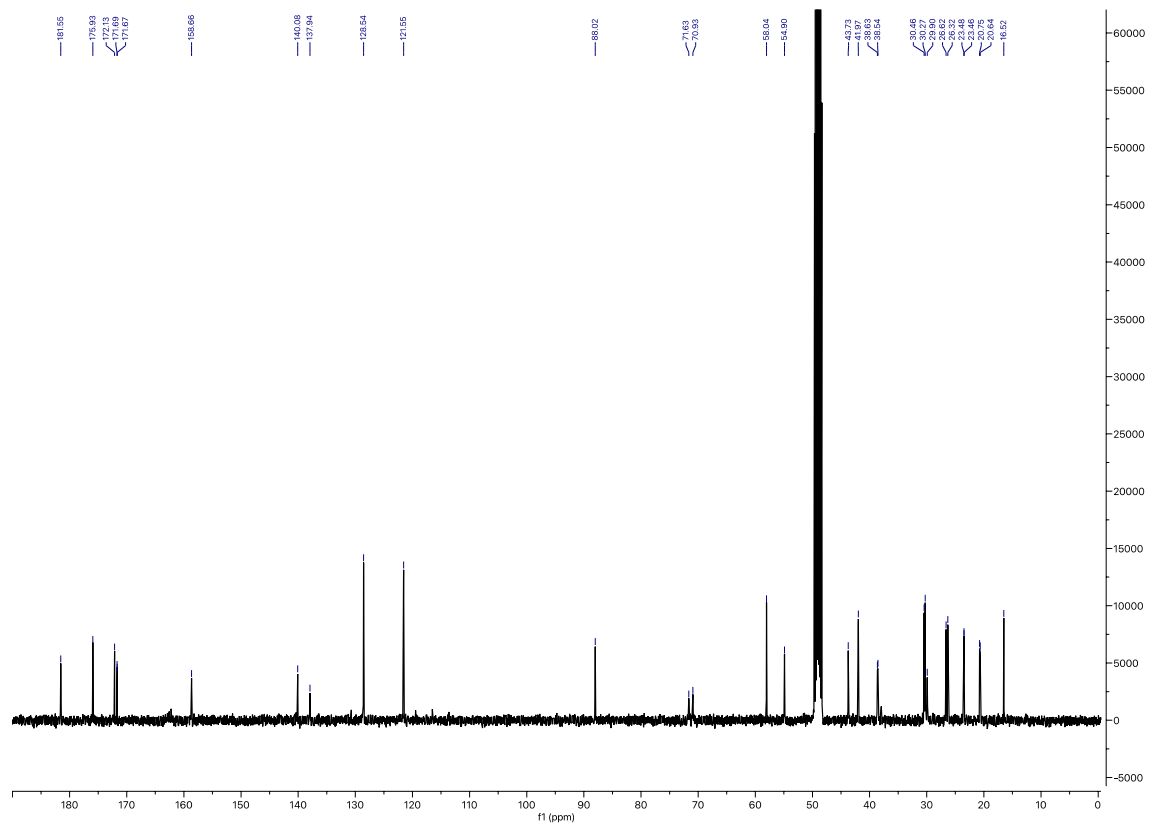

Figure S23: 2-a ( $^{13}\text{C}$  DEPT 135 NMR)

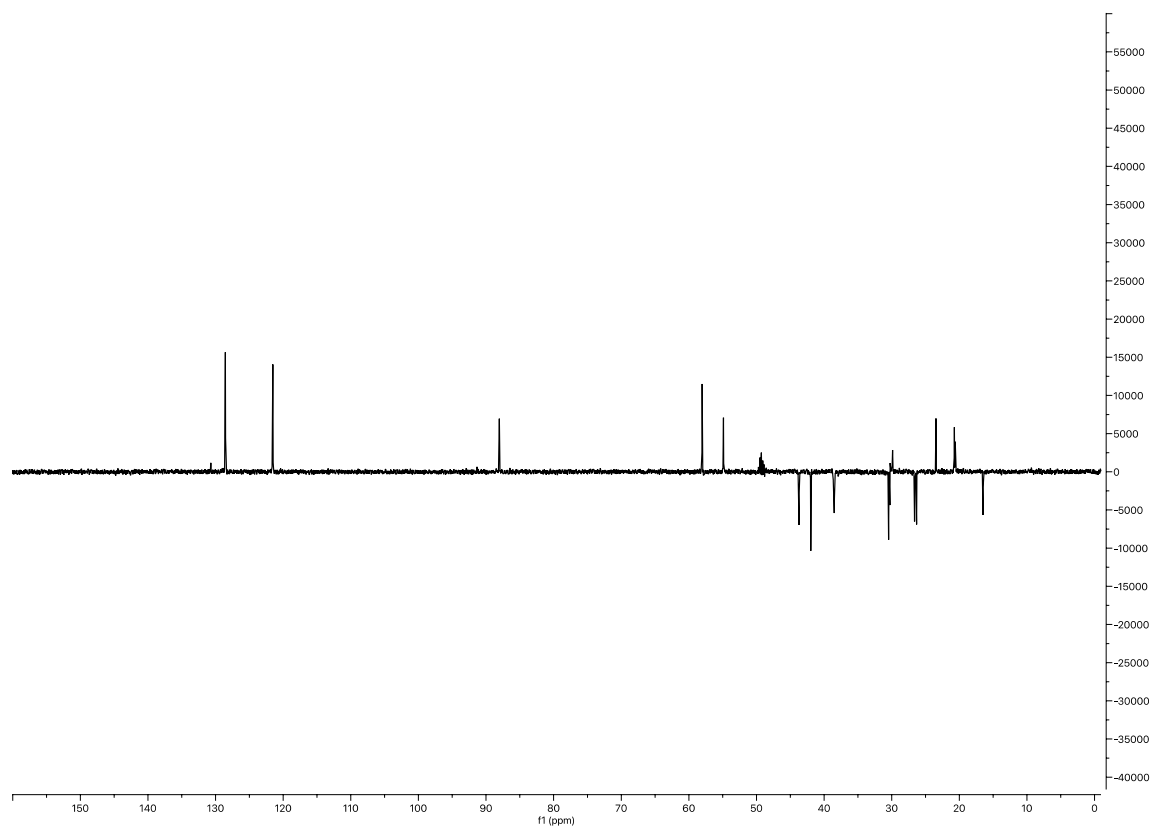

Figure S24: 2-a (HRMS)

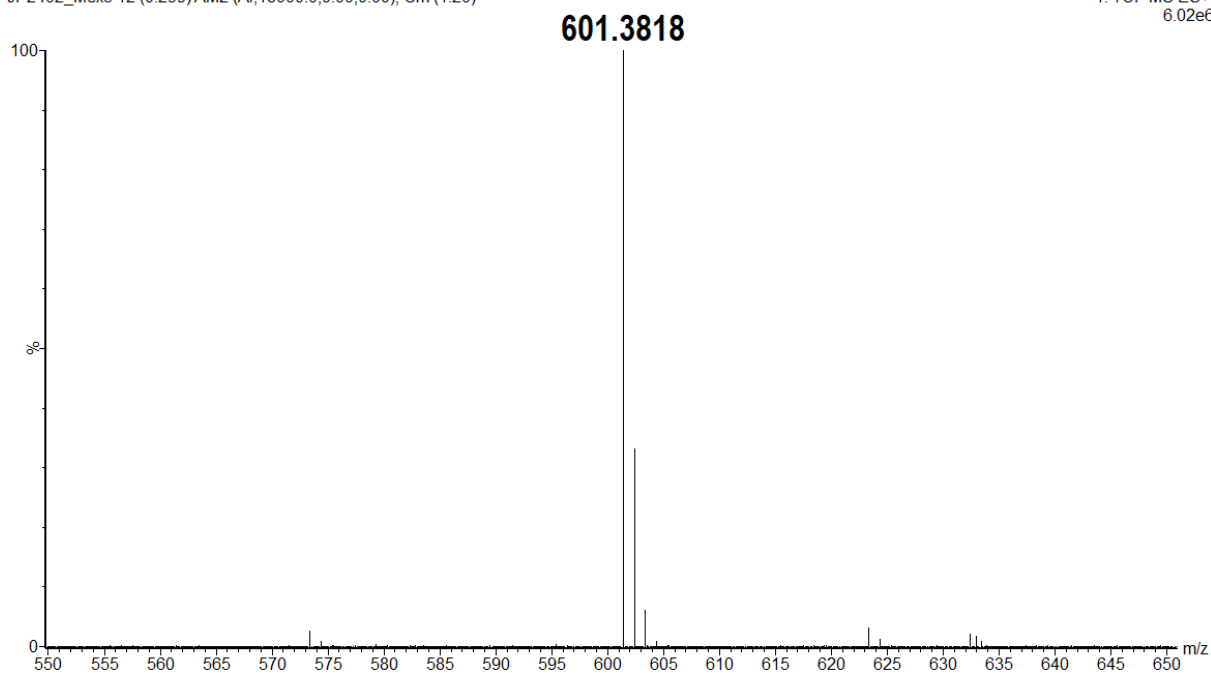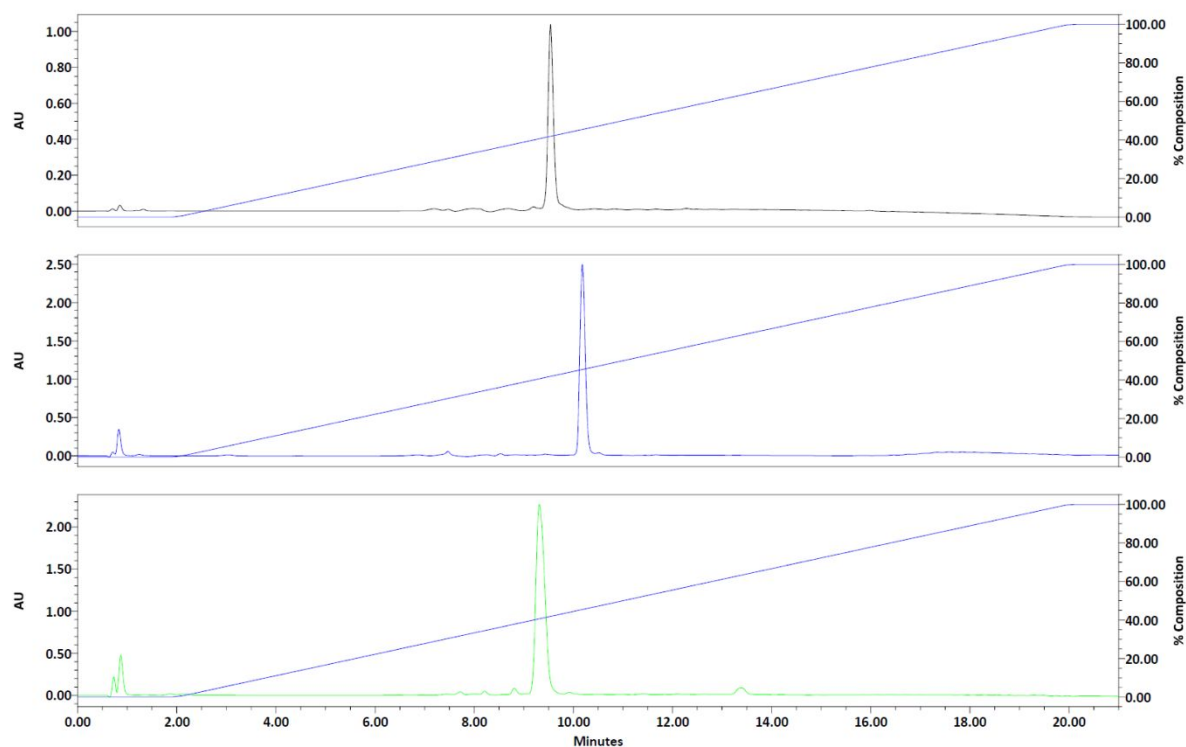

Figure S25: HPLC traces of pGlu-Gly-Lys-Anilide-TEMPO 1.a (Black) Succinyl-Ala-Ala-pro-Val-anilide-TEMPO (blue) pGlu-Gly-Arg-Anilide-TEMPO 2.a (green) for purity check. Detection at 214 nm. Column x-bridge BEH C-18 46x50 mm. Gradient: Solvent A (0.05% TFA in water) to solvent B (0.05% TFA in acetonitrile) in 20 minutes.

Kinetic Analysis of Alkoxyamine Bond Homolysis.

The kinetic homolysis for peptide-alkoxyamines reported in Table 1 was recorded in EPR using water as solvent. Table S1. Experimental temperatures (T), homolysis rate constants  $k_d$ , activation energies  $E_a$  in H<sub>2</sub>O for peptide-alkoxyamine **1a** and **2a**.

| Peptide-Alkoxyamine | T (°C) <sup>a</sup> | $k_d$ (10 <sup>-4</sup> s <sup>-1</sup> ) <sup>a,b,c</sup> | $E_a$ (KJ.mol <sup>-1</sup> ) <sup>b,d</sup> |
|---------------------|---------------------|------------------------------------------------------------|----------------------------------------------|
| <b>1a</b>           | 95                  | 4.6                                                        | 124.8                                        |
| <b>2a</b>           | 95                  | 2.7                                                        | 126.5                                        |

<sup>a</sup>In water <sup>b</sup>Values measured for a mixture of diastereoisomers. <sup>c</sup>Given by Equation (1). <sup>d</sup>Given by Equation (2), and an averaged frequency factor was used  $A = 2.4 \cdot 10^{14} \text{ s}^{-1}$ ,  $R = 8.314 \text{ J.K}^{-1} \cdot \text{mol}^{-1}$ ,  $k_d$ , and T are given in columns 2, 3 in Table 1.

The growth of nitroxide was recorded in the presence of an alkyl radical scavenger, i.e., O<sub>2</sub> here, to suppress the back reaction ( $k_c$  in Scheme 1), as already reported [1].

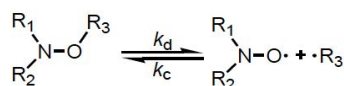

Scheme S1. Dynamic covalent bond in alkoxyamines:  $k_d$  stands for the homolysis rate constant and  $k_c$  stands for the re-formation reaction.

Homolysis rate constants  $k_d$  are given by Equation S1 ( $[\text{nitroxide}]_\infty = [\text{alkoxyamine}]_0 = 0.1 \text{ mM}$ ), and the subsequent activation energy values  $E_a$  are given by Equation S2, as follows [1]:

$$\ln \left( \frac{[\text{nitroxide}]_\infty - [\text{nitroxide}]_t}{[\text{nitroxide}]_\infty} \right) = -k_d \cdot t \quad (1)$$

$$E_a = -RT \ln \left( \frac{k_d}{A} \right) \quad (2)$$

### Figure S26: Proof for the inactivity of MMP-2 on suc-AAPV-Anilide-TEMPO.

Activity of MMP-2 sample was first verified by incubation the enzyme overnight at 37°C with a commercial substrate (M-1855, BACHEM) and running reverse phase HPLC:

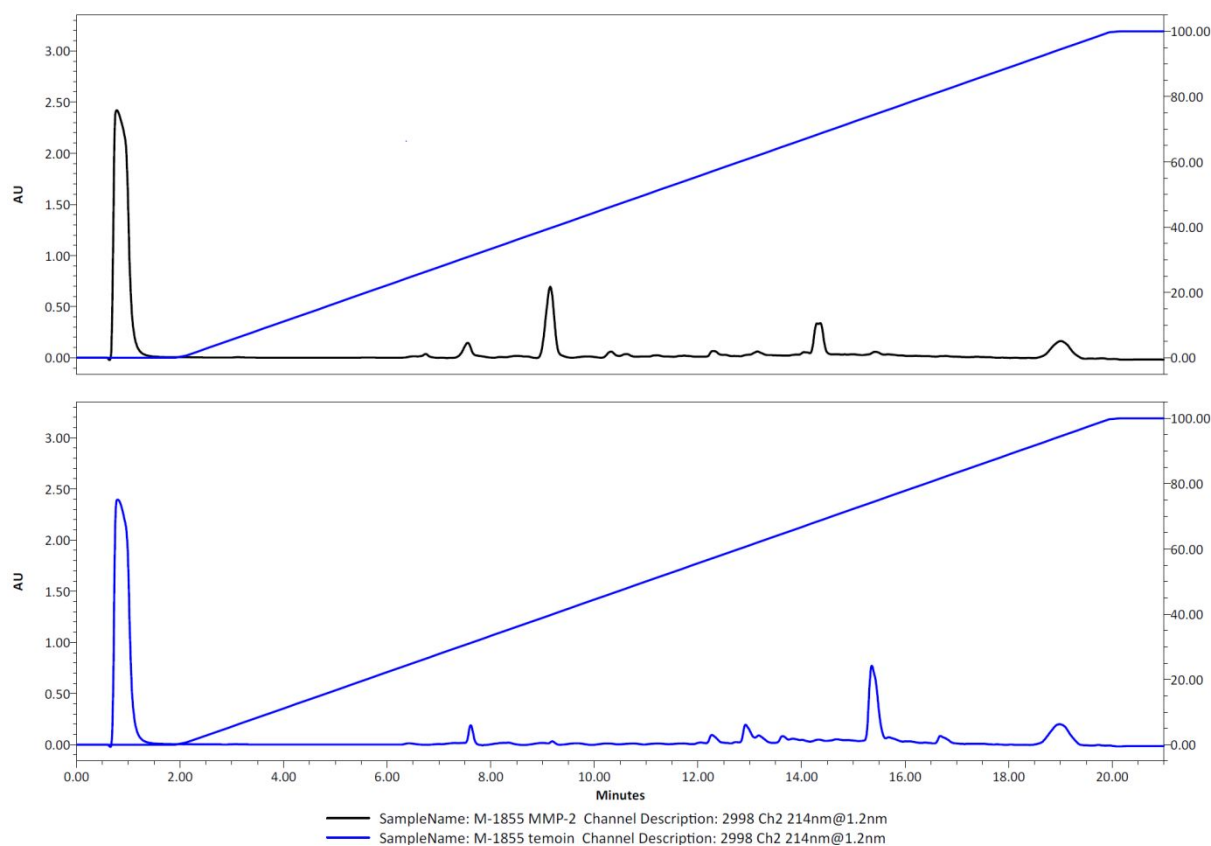

The HPLC trace shows complete hydrolysis of the substrate.



Then suc-AAPV-Anilide-TEMPO was incubated overnight at 37 °C in the presence or absence of MMP-2.

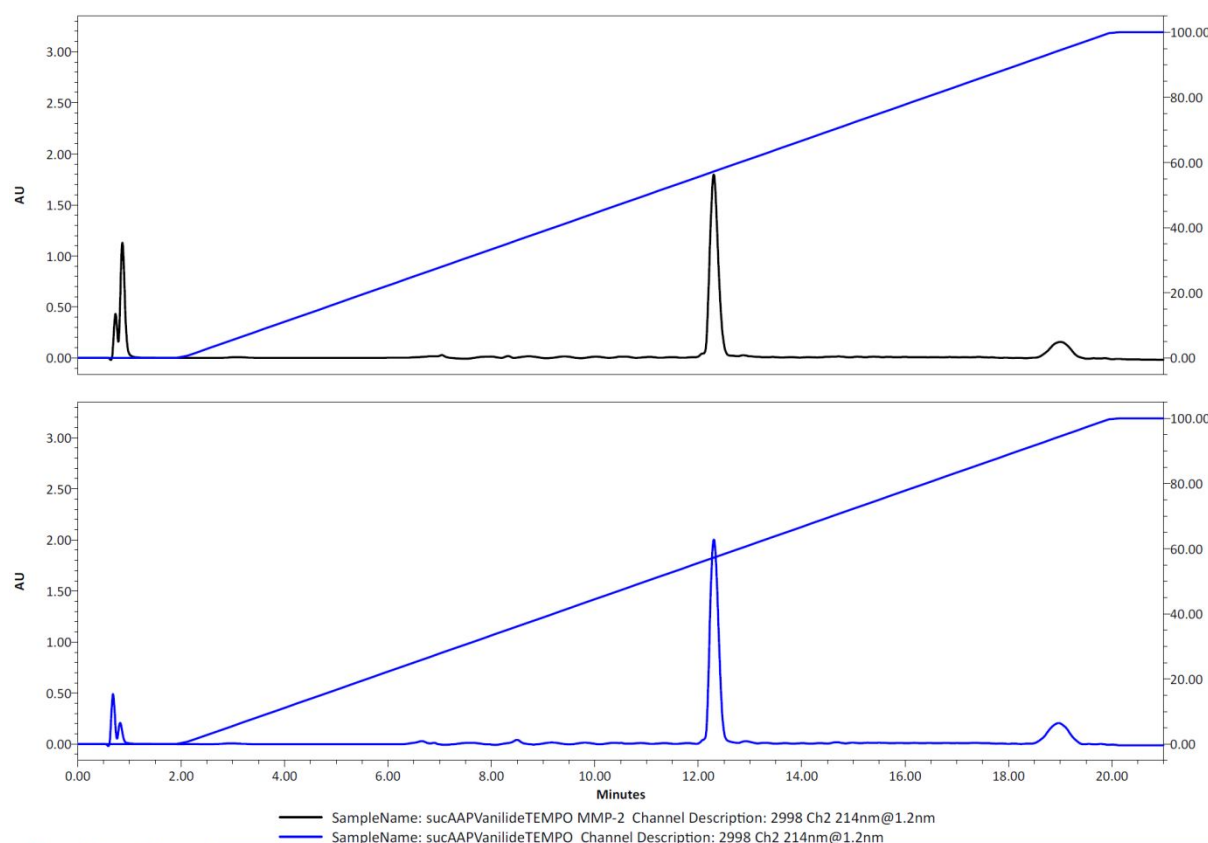

No significant loss of the alkoxyamine is visible thus showing that MMP-2 does not hydrolyze the peptide from the prodrug.

## References

[1] T. Reyser, T. To, C. Egwu, L. Paloque, M. Nguyen, A. Hamouy, J-L. S. gliani, C. Bijani, J-M. Augereau, JP. Joly, J. Portela, J. Havot, S.R.A. Marque, J. Boissier, A. Robert, F. Benoit-Vical, G. Audran, Alkoxyamines Designed as Potential Drugs against Plasmodium and Schistosoma Parasites. *Molecules*, **2020**, *25*, 3838.
